# Supplementary material for: DNA extraction from recently fertilised Atlantic salmon embryos for use in microsatellite validation of triploidy
Source: PubMed Central journal article supplement (PMC10550122; doi:10.1371/journal.pone.0292319), 2023-10-04
Supplement: pone.0292319.s001.pdf [file pone.0292319.s001.pdf]

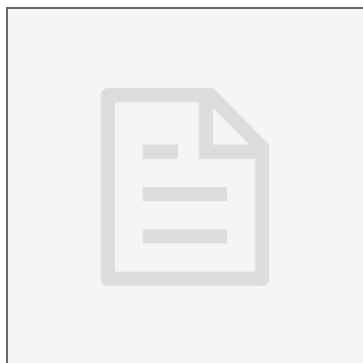

SEP 01, 2023

## 🌐 DNA extraction from recently fertilised Atlantic salmon embryos for use in microsatellite validation of triploidy

Caroline R.

Callum Howard<sup>1</sup>, John B. Taggart<sup>1</sup>, Bradley<sup>2</sup>,

Alejandro P.

John F.

Gutierrez<sup>1</sup>,

Taylor<sup>1</sup>,

Paulo A. Prodöhl<sup>2</sup>,

Michaël

Herve Migaud<sup>1</sup>, Bekaert<sup>1</sup>

<sup>1</sup>Institute of Aquaculture, University of Stirling, Stirling, United Kingdom;

<sup>2</sup>School of Biological Sciences, Queen's University Belfast, Belfast, United Kingdom

Callum Howard: Current Address: AquaBioTech Group, Mosta, Malta;

John F. Taylor: Current Address: AquaMaof Aquaculture Technologies Ltd., Rosh Ha'ayin, Israel

Herve Migaud: Current Address: Mowi Scotland, Glen Nevis Business Park, Fort William, United Kingdom

Michaël Bekaert: michael.bekaert@stir.ac.uk

OPEN ACCESS

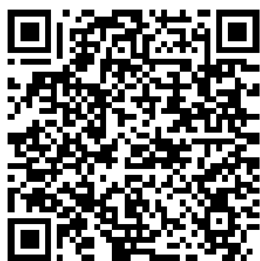

DOI:

[dx.doi.org/10.17504/protocols.io.kqdg3x93pg25/v1](https://dx.doi.org/10.17504/protocols.io.kqdg3x93pg25/v1)

**Protocol Citation:** Callum Howard, John B. Taggart, Caroline R. Bradley, Alejandro P. Gutierrez, John F. Taylor, Paulo A. Prodöhl, Herve Migaud, Michaël Bekaert 2023. DNA extraction from recently fertilised Atlantic salmon embryos for use in microsatellite validation of triploidy. **protocols.io** <https://dx.doi.org/10.17504/protocols.io.kqdg3x93pg25/v1>

**License:** This is an open access protocol distributed under the terms of the [Creative Commons Attribution License](https://creativecommons.org/licenses/by/4.0/), which permits unrestricted use, distribution, and reproduction in any medium, provided the original author and source are credited

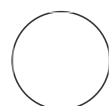

Michaël Bekaert

### ABSTRACT

The current methods used for producing triploid Atlantic salmon are generally reliable but not infallible, and each batch of triploids must be validated to ensure consumer trust and licensing compliance. Microsatellites have recently been shown to offer a cheaper and more convenient alternative to traditional flow cytometry for triploidy validation in a commercial setting. However, incubating eggs to at least the eyed stage for microsatellite validation poses challenges, such as reduced quality and performance of triploids produced from later eggs in the stripping season. To address these issues, we propose another option: extracting DNA from recently fertilised eggs for use in conjunction with microsatellite validation. To achieve this, we have developed an optimized protocol for HotSHOT extraction that can rapidly and cheaply extract DNA from Atlantic salmon embryos, which can then be used for triploidy validation through microsatellites. Our approach offers a simpler and more cost-effective way to validate triploidy, without the need for skilled dissection or expensive kits.

**Protocol status:** Working  
We use this protocol and it's working

**Created:** Aug 08, 2023

**Last Modified:** Sep 01, 2023

**PROTOCOL integer ID:**  
86092

**Keywords:** DNA extraction, DNA quality and quantity assessments, Microsatellites validation assessment, Egg, Triploid, Salmon

## MATERIALS

### Consumables

Low throughput:

- 1.5 mL Screw cap tube

High throughput:

- 96-well Clear Round Bottom 2 mL Polypropylene Deep Well Plate
- 96-well Deep well plate seals

### Reagents

- NaOH
- EDTA
- Tris-HCl 5 mM pH 8
- Tris-HCl dry
- TAE buffer
- MyTaq HS mix (Bioline, USA)
- Loading dye (ThermoFisher Scientific, UK)
- WellRED size standard (Eurofins, Germany)
- Gel electrophoresis reagents
- 100% ethanol
- ddH<sub>2</sub>O

### Lab Equipment

- Forceps
- Beakers
- Heat block or laboratory oven
- Centrifuge (capable of 20,000 *g*)
- Gel electrophoresis machine
- PCR machine

### Reagent preparation

For 200 mL each alkaline lysis reagent and neutralisation buffer (enough for 500 samples).

Alkaline Lysis Reagent

| Reagent | Final conc. | Amount for 200 mL |
|---------|-------------|-------------------|
| NaOH    | 25 mM       | 200 mg            |
| EDTA    | 0.2 mM      | 14.88 mg          |

*Add ddH<sub>2</sub>O for final volume of 200 mL. pH will be 12.*

Neutralisation Buffer

| Reagent  | Final conc. | Amount for 200 mL |
|----------|-------------|-------------------|
| Tris-HCl | 40 mM       | 1.3 g             |

*Add ddH<sub>2</sub>O for final volume of 200 mL. pH will be 5.*

1 If eggs stored in ethanol, remove using forceps and place on clean tissue to remove excess ethanol.

2 Place embryos in a beaker of Tris-HCl ( [M] 5 millimolar (mM) ,  $\text{pH}$  8 ) for 00:15:00 .

15m

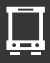

3 Remove the eggs and remove excess liquid with clean tissue.

4 For low throughput needs the eggs can then be placed into individual 1.5 mL screw cap tubes, for high throughput needs the eggs can be places, one per well, into a 2 mL deep 96-well plate.

5 Pierce the chorion by applying pressure using the end of the forceps.

#### Note

Between eggs, the forceps must be wiped clean before being sterilised using 100% ethanol and ddH<sub>2</sub>O.

6 Add 400  $\mu\text{L}$  alkaline lysis buffer to each tube/well and seal.

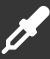

7 Invert 5 times, and placed into either a heat block or a laboratory oven running at 90  $^{\circ}\text{C}$  for

30m

00:30:00 .

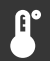

8 Remove and place On ice for 00:05:00 .

5m

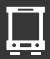

9 Unseal and add an equal amount ( 400  $\mu\text{L}$  ) of neutralisation buffer.

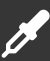

10 Reseal and rapidly invert 10 times and then spin down briefly using a centrifuge.

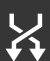

11 Spin down for  14000 rpm, 00:00:30 (or 20,000 g).

30s

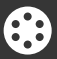

12 Collect the middle layer of the solution.

#### Note

The bottom layer contains the egg and solid contaminants, while the top layer contains lipid contaminants.

13 The DNA (middle layer) can now be used instantly, stored at  4 °C for up to a week, or stored at  -18 °C for use later on.

## DNA quality and quantity assessments

8m 10s

14

#### Note

In order to evaluate the effectiveness of the DNA extraction process and usability of the extracted DNA, a combination of PCR followed by gel electrophoresis and qPCR can be used. A fragment of the Malic Enzyme 2 gene (exon 3; 472 bp) was amplified using primers previously designed and validated [1]. This gene was selected due to its well-established availability and its size being within the range of the microsatellites of interest.

Mix  0.5  $\mu\text{L}$  of sample DNA (middle layer),  3  $\mu\text{L}$  MyTaq HS mix (Bioline, USA),  0.6 picomolar (pM) of each primer (  0.12  $\mu\text{L}$  ) and  2.26  $\mu\text{L}$  ultrapure water in PCR tube or plate (  10  $\mu\text{L}$  total).

15 Perform PCR at the appropriate thermal cycle for gene of interest.

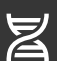

15.1 In this case, 38 cycles of

 95 °C for  00:00:15 ,

 60 °C for  00:00:15 and

 72 °C for  00:00:40 .

44m 20s

16 Load 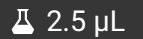 2.5  $\mu\text{L}$  of the PCR product into a 1.25% agarose gel with  5  $\mu\text{L}$  of 1.5 $\times$  loading dye (ThermoFisher Scientific, UK) in 0.5 $\times$  TAE buffer.

17 Migrate the gel with ethidium bromide and visualised under UV in a transilluminator for the quality of bands and the presence of smear or primer dimer.

18

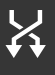

#### Note

The qPCR reactions were run on a QTower 3 (Analytik Jena, Germany) in accordance with the manufacturer's instructions:

Mix  1  $\mu\text{L}$  of sample DNA (middle layer),  5  $\mu\text{L}$  Sensifast SYBR No-ROX kit (Bioline, USA),  1 picomolar (pM) of each primer ( 0.2  $\mu\text{L}$ ),  3.6  $\mu\text{L}$  ultrapure water in qPCR plate.

19 Perform qPCR starting by  95  $^{\circ}\text{C}$  for  00:03:00 followed by the appropriate thermal cycle for gene of interest.

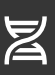

3m

19.1 In this case, 40 cycles of

 95  $^{\circ}\text{C}$  for  00:00:15,

 60  $^{\circ}\text{C}$  for  00:00:15 and

 72  $^{\circ}\text{C}$  for  00:00:30.

40m

## Microsatellites validation assessment

20

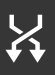

#### Note

A qualitative assessment of the strength of the band was used to determine the amount of PCR product to be added to the capillary electrophoresis (between 0.5  $\mu\text{L}$  and 1  $\mu\text{L}$ ).

Mix required quantity of PCR product with 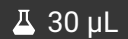 30  $\mu\text{L}$  of sample loading solution (SLS), and  0.35  $\mu\text{L}$  of size standard (WellRED size standard, Eurofins, Germany) and add to well of capillary electrophoresis plate.

21 Top each well off with one drop of mineral oil.

22 Run capillary electrophoresis machine (Beckman Coulter CEQ 8000, Beckman Coulter, USA) according to the manufacturer's instructions.
