# Supplementary material for: DNA extraction from recently fertilised Atlantic salmon embryos for use in microsatellite validation of triploidy
Source: PubMed Central journal article supplement (PMC10550122; doi:10.1371/journal.pone.0292319), 2023-10-04
Supplement: pone.0292319.s002.pdf [file pone.0292319.s002.pdf]

# DNA extraction from recently fertilised Atlantic salmon embryos for use in microsatellite validation of triploidy

## S1 Table. Key resources

### *Consumables*

- Low throughput
- 1.5 mL Screw cap tube
- High throughput
- 96-well Clear Round Bottom 2 mL Polypropylene Deep Well Plate
- 96-well Deep well plate seals

### *Reagents*

- NaOH
- EDTA
- Tris-HCl 5 mM pH 8
- Tris-HCl dry
- Gel electrophoresis reagents
- PCR reagents
- 100% ethanol
- ddH<sub>2</sub>O

### *Lab Equipment*

- Forceps
- Beakers
- Heat block or laboratory oven
- Centrifuge (capable of 20,000 g)
- Gel electrophoresis system
- PCR machine

### *Reagent preparation*

For 200 mL each alkaline lysis reagent and neutralisation buffer (enough for 500 samples).

#### **S1.1. Alkaline Lysis Reagent**

| <b>Reagent</b> | <b>Final conc.</b> | <b>Amount for 200 mL</b> |
|----------------|--------------------|--------------------------|
| NaOH           | 25 mM              | 200 mg                   |
| EDTA           | 0.2 mM             | 14.88 mg                 |

Add ddH<sub>2</sub>O for final volume of 200 mL. pH will be 12.

#### **S1.2. Neutralisation Buffer**

| <b>Reagent</b> | <b>Final conc.</b> | <b>Amount for 200 mL</b> |
|----------------|--------------------|--------------------------|
| Tris-HCl       | 40 mM              | 1.3 g                    |

Add ddH<sub>2</sub>O for final volume of 200 mL. pH will be 5.
