# Supplementary material for: DNA extraction from recently fertilised Atlantic salmon embryos for use in microsatellite validation of triploidy
Source: PubMed Central journal article supplement (PMC10550122; doi:10.1371/journal.pone.0292319), 2023-10-04
Supplement: pone.0292319.s003.pdf [file pone.0292319.s003.pdf]

Lanes

X 26 26 26 44 44 44 61 61 61 78 78 78 M + + - - X

Original image

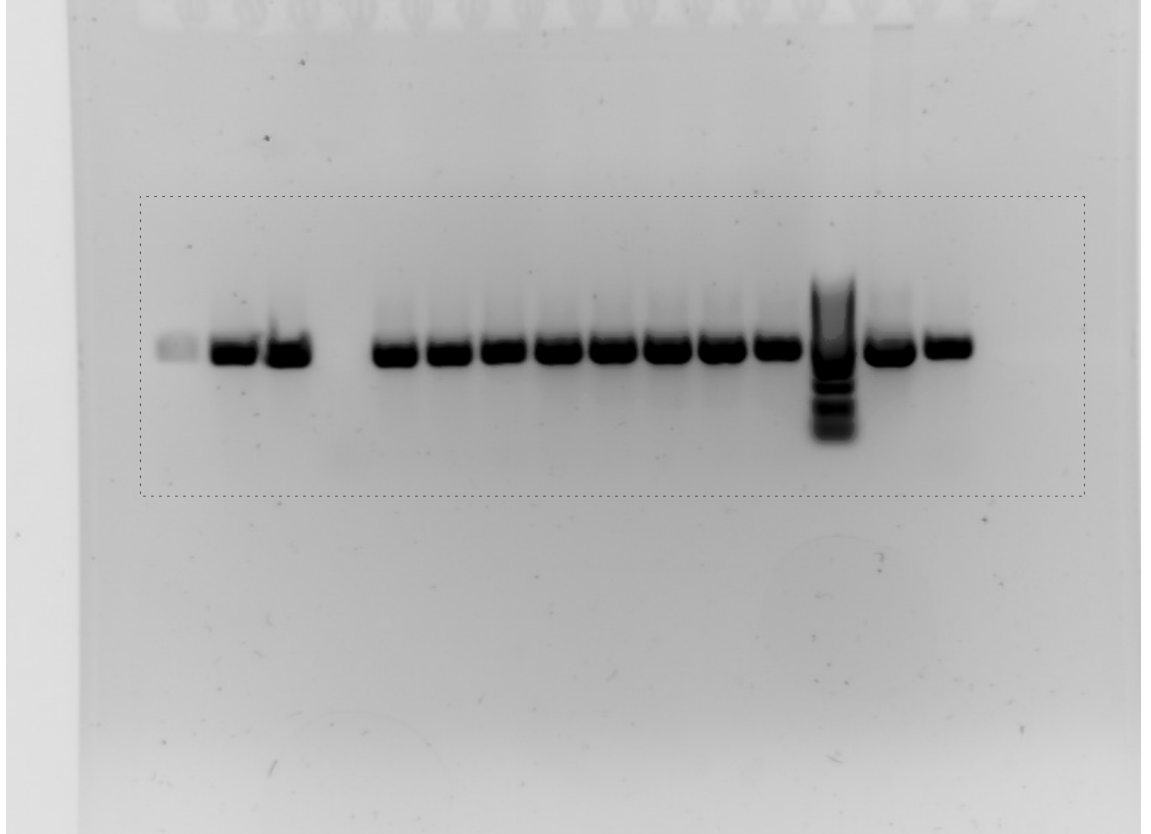

Cropped section  
(Fig 1A)
